# Supplementary material for: Preparation of Surface Dispersed WO3/BiVO4 Heterojunction Arrays and Their Photoelectrochemical Performance for Water Splitting
Source: MDPI journal article supplement (doi:10.3390/molecules29020372), 2024-01-11
Supplement: s1 [file s1]

## Supplementary Material

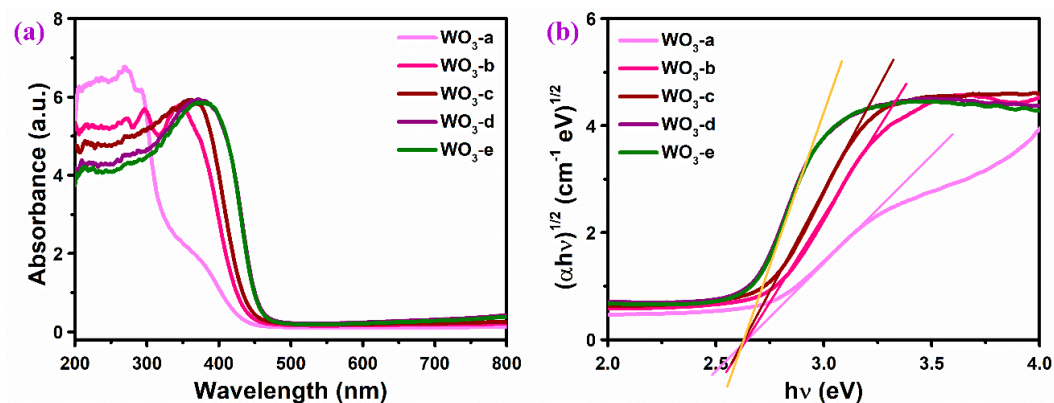

**Figure S1** (a) UV-vis absorption spectra and (b) Tauc plots of WO<sub>3</sub> arrays.

The UV-visible light absorption performance of different WO<sub>3</sub> nanoflake arrays is shown in Figure S1. As the coverage of nanoflakes on FTO substrate increases, the light absorption is significantly enhanced. Specially, although the thickness of WO<sub>3</sub>-e is obviously higher than that of WO<sub>3</sub>-d, the light absorption properties of WO<sub>3</sub>-e and WO<sub>3</sub>-d are similar, indicating that WO<sub>3</sub>-d with the thickness of 3.2  $\mu\text{m}$  can ensure adequate light absorption. According to the corresponding Tauc curve in Figure S1b, the band gap of all the WO<sub>3</sub> arrays is estimated to be the same, about 2.64 eV.

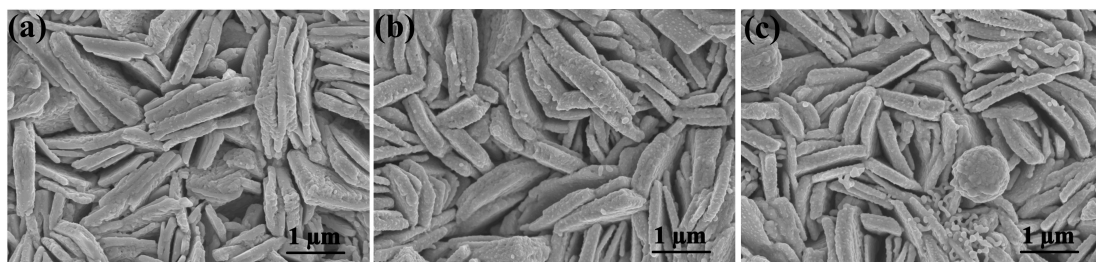

**Figure S2** SEM images of  $\text{WO}_3/\text{BiVO}_4$  composite arrays, (a)  $\text{WO}_3/\text{BiVO}_4$ -5, (b)  $\text{WO}_3/\text{BiVO}_4$ -10, (c)  $\text{WO}_3/\text{BiVO}_4$ -20.

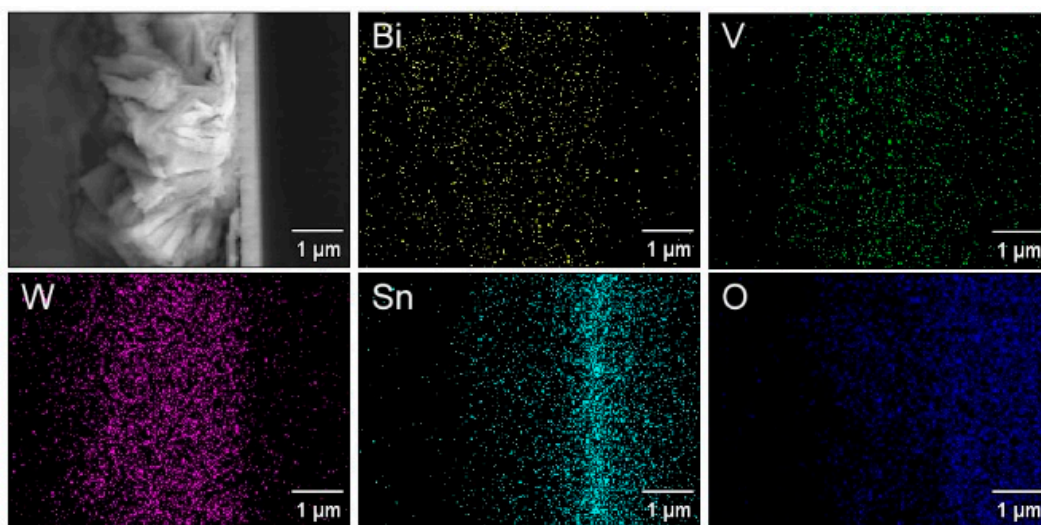

**Figure S3** Cross-sectional view SEM image of  $\text{WO}_3/\text{BiVO}_4$ -10 and the corresponding elemental mapping.

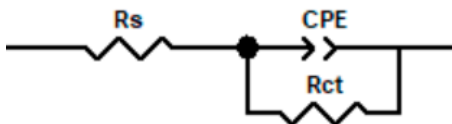

**Figure S4** The equivalent circuit of the electrochemical impedance spectra
